# Supplementary material
Source: Research Square preprint supplement (doi:10.21203/rs.3.rs-9532991/v1)
Supplement: Supplementary file 1 [file 1f81aa1f659ec4277e0cc464.pdf]

Table S1

| Accession  | Description                                                            | Gene Symbol   | EXP-1      |                      |             | EXP-2      |                      |             |
|------------|------------------------------------------------------------------------|---------------|------------|----------------------|-------------|------------|----------------------|-------------|
|            |                                                                        |               | PSM #      | Abundance Ratio (AR) | Log2 (AR)   | PSM #      | Abundance Ratio (AR) | Log2 (AR)   |
| Q9Z138     | <b>Tyrosine-protein kinase transmembrane receptor ROR2</b>             | <b>Ror2</b>   | <b>106</b> | <b>100.00</b>        | <b>6.64</b> | <b>126</b> | <b>100.00</b>        | <b>6.64</b> |
| P06795     | ATP-dependent translocase                                              | Abcb1b        | 2          | 5.22                 | 2.38        | 13         | 7.54                 | 2.91        |
| P60710     | Actin, cytoplasmic 1                                                   | Actb          | 513        | 5.82                 | 2.54        | 436        | 7.11                 | 2.83        |
| P68033     | Actin, alpha cardiac muscle 1                                          | Actc1         | 252        | 5.93                 | 2.57        | 232        | 5.92                 | 2.56        |
| P61161     | Actin-related protein 2                                                | Actr2         | 7          | 5.79                 | 2.53        | 22         | 4.78                 | 2.26        |
| Q99JY9     | Actin-related protein 3                                                | Actr3         | 16         | 5.64                 | 2.49        | 28         | 4.18                 | 2.06        |
| Q810B6     | Rabankyrin-5                                                           | Ankfy1        | 43         | 100.00               | 6.64        | 109        | 4.67                 | 2.22        |
| H3BIU7     | Rho guanine nucleotide exchange factor 2                               | Arhgef2       | 7          | 2.48                 | 1.31        | 53         | 2.52                 | 1.33        |
| Q9WV32     | Actin-related protein 2/3 complex subunit 1B                           | Arpc1b        | 9          | 5.78                 | 2.53        | 26         | 3.68                 | 1.88        |
| Q9CVB6     | Actin-related protein 2/3 complex subunit 2                            | Arpc2         | 16         | 3.23                 | 1.69        | 28         | 3.96                 | 1.99        |
| Q9JM76     | Actin-related protein 2/3 complex subunit 3                            | Arpc3         | 2          | 100.00               | 6.64        | 7          | 5.20                 | 2.38        |
| P59999     | Actin-related protein 2/3 complex subunit 4                            | Arpc4         | 4          | 3.51                 | 1.81        | 10         | 3.30                 | 1.72        |
| Q00993     | Tyrosine-protein kinase receptor UFO                                   | Axl           | 4          | 100.00               | 6.64        | 26         | 10.43                | 3.38        |
| F8WI22     | Bcl-2-associated transcription factor 1                                | Bclaf1        | 34         | 2.72                 | 1.44        | 95         | 6.89                 | 2.78        |
| P35564     | Calnexin                                                               | Canx          | 9          | 3.90                 | 1.96        | 24         | 6.20                 | 2.63        |
| Q61081     | Hsp90 co-chaperone Cdc37                                               | Cdc37         | 6          | 100.00               | 6.64        | 22         | 4.90                 | 2.29        |
| Q9WUM4     | Coronin-1C                                                             | Coro1c        | 26         | 6.43                 | 2.68        | 29         | 3.76                 | 1.91        |
| Q9WVK4     | EH domain-containing protein 1                                         | Eh1           | 2          | 5.69                 | 2.51        | 20         | 2.55                 | 1.35        |
| Q8BGD9     | Eukaryotic translation initiation factor 4B                            | Eif4b         | 15         | 100.00               | 6.64        | 21         | 7.45                 | 2.90        |
| Q03145     | Ephrin type-A receptor 2                                               | Epha2         | 7          | 100.00               | 6.64        | 33         | 12.04                | 3.59        |
| G3UW85     | Enhancer of rudimentary homolog                                        | Erh           | 2          | 5.71                 | 2.51        | 9          | 7.28                 | 2.86        |
| Q9J28      | Protein flightless-1 homolog                                           | Flii          | 262        | 95.84                | 6.58        | 312        | 100.00               | 6.64        |
| Q8BTM8     | Filamin-A                                                              | Flna          | 358        | 2.62                 | 1.39        | 523        | 2.47                 | 1.31        |
| P13020     | Gelsolin                                                               | Gsn           | 262        | 34.32                | 5.10        | 231        | 48.22                | 5.59        |
| Q8BGC0     | HIV Tat-specific factor 1 homolog                                      | Htatsf1       | 3          | 2.66                 | 1.41        | 10         | 9.81                 | 3.29        |
| Q9CQW9     | Interferon-induced transmembrane protein 3                             | Ifitm3        | 2          | 100.00               | 6.64        | 10         | 100.00               | 6.64        |
| E9QLA5     | Inverted formin-2                                                      | Inf2          | 6          | 100.00               | 6.64        | 24         | 3.13                 | 1.64        |
| Q8BKCS     | Importin-5                                                             | Ipo5          | 4          | 2.47                 | 1.30        | 29         | 2.50                 | 1.32        |
| B1ASP2     | Tyrosine-protein kinase Jak1                                           | Jak1          | 65         | 2.95                 | 1.56        | 121        | 8.62                 | 3.11        |
| E0CYQ0     | Potassium channel tetramerisation domain-containing 17                 | Kctd17        | 35         | 16.78                | 4.07        | 43         | 15.44                | 3.95        |
| F6SH71     | BTB/POZ domain-containing protein KCTD5 (Fragment)                     | Kctd2         | 8          | 100.00               | 6.64        | 12         | 100.00               | 6.64        |
| Q8VCS7     | BTB/POZ domain-containing protein KCTD5                                | Kctd5         | 21         | 72.12                | 6.17        | 28         | 100.00               | 6.64        |
| Q80W68     | Kin of IRRE-like protein 1                                             | Kirrel1       | 2          | 100.00               | 6.64        | 14         | 5.50                 | 2.46        |
| P16045     | Galectin-1                                                             | Lgals1        | 15         | 18.90                | 4.24        | 24         | 4.02                 | 2.01        |
| Q3UZ39     | Leucine-rich repeat flightless-interacting protein 1                   | Lrrfip1       | 142        | 39.46                | 5.30        | 180        | 50.62                | 5.66        |
| AOA0G2JEP4 | Leucine-rich repeat flightless-interacting protein 2                   | Lrrfip2       | 127        | 35.95                | 5.17        | 132        | 100.00               | 6.64        |
| AOA3Q4EGK3 | Latent-transforming growth factor beta-binding protein 1               | Ltbp1         | 29         | 15.09                | 3.92        | 44         | 100.00               | 6.64        |
| P14873     | Microtubule-associated protein 1B                                      | Map1b         | 59         | 4.67                 | 2.22        | 160        | 10.74                | 3.42        |
| Q62073     | <b>Mitogen-activated protein kinase kinase 7</b>                       | <b>Map3k7</b> | <b>27</b>  | <b>2.50</b>          | <b>1.32</b> | <b>42</b>  | <b>4.98</b>          | <b>2.32</b> |
| Q3V3R1     | Monofunctional C1-tetrahydrofolate synthase, mitochondrial             | Mthfd1l       | 155        | 6.01                 | 2.59        | 208        | 46.47                | 5.54        |
| AOA0N4SW94 | Myeloid-associated differentiation marker (Fragment)                   | Myadm         | 4          | 100.00               | 6.64        | 9          | 3.23                 | 1.69        |
| Q8VDD5     | Myosin-9                                                               | Myh9          | 312        | 4.18                 | 2.06        | 523        | 9.41                 | 3.23        |
| Q3THE2     | Myosin regulatory light chain 12B                                      | Myl12b        | 7          | 100.00               | 6.64        | 18         | 12.14                | 3.60        |
| AOA1W2P6F6 | Myosin light polypeptide 6                                             | Myl6          | 16         | 6.70                 | 2.74        | 20         | 10.18                | 3.35        |
| Q9JMH9     | Unconventional myosin-XVIIIa                                           | Myo18a        | 287        | 9.68                 | 3.28        | 338        | 28.22                | 4.82        |
| Q9WTI7     | Unconventional myosin-1c                                               | Myo1c         | 239        | 3.67                 | 1.88        | 336        | 8.53                 | 3.09        |
| E9Q175     | Unconventional myosin-VI                                               | Myo6          | 38         | 3.69                 | 1.88        | 71         | 3.19                 | 1.68        |
| Q8BSH9     | Nucleosome assembly protein 1-like 1                                   | Nap1l1        | 18         | 3.94                 | 1.98        | 39         | 3.37                 | 1.75        |
| AOA494BA4  | NEDD4 family-interacting protein 1                                     | Ndfip1        | 5          | 4.96                 | 2.31        | 20         | 15.69                | 3.97        |
| B2RXS4     | Plexin-B2                                                              | Plxn2         | 9          | 100.00               | 6.64        | 34         | 15.15                | 3.92        |
| Q61074     | Protein phosphatase 1G                                                 | Ppm1g         | 2          | 100.00               | 6.64        | 8          | 3.52                 | 1.82        |
| AOA0U1RN12 | Serine/threonine-protein phosphatase 6 regulatory subunit 1 (Fragment) | Ppp6r1        | 3          | 100.00               | 6.64        | 15         | 2.99                 | 1.58        |
| Q8CIG8     | Protein arginine N-methyltransferase 5                                 | Prmt5         | 38         | 2.67                 | 1.42        | 51         | 3.13                 | 1.65        |
| Q8CCF0     | U4/U6 small nuclear ribonucleoprotein Prp31                            | Prp31         | 25         | 4.25                 | 2.09        | 65         | 4.87                 | 2.28        |
| Q9DOM1     | Phosphoribosyl pyrophosphate synthase-associated protein 1             | Prpsap1       | 4          | 100.00               | 6.64        | 15         | 2.65                 | 1.41        |
| Q8R574     | Phosphoribosyl pyrophosphate synthase-associated protein 2             | Prpsap2       | 3          | 100.00               | 6.64        | 10         | 100.00               | 6.64        |
| Q52KR3     | Protein prune homolog 2                                                | Prune2        | 9          | 100.00               | 6.64        | 20         | 100.00               | 6.64        |
| P62192     | 26S proteasome regulatory subunit 4                                    | Psmc1         | 4          | 5.93                 | 2.57        | 28         | 4.00                 | 2.00        |
| AOA140LIZ5 | 26S proteasome regulatory subunit 6B                                   | Psmc4         | 4          | 100.00               | 6.64        | 30         | 4.91                 | 2.29        |
| Q3TXS7     | 26S proteasome non-ATPase regulatory subunit 1                         | Psm1          | 7          | 42.52                | 5.41        | 36         | 5.07                 | 2.34        |
| Q8VDM4     | 26S proteasome non-ATPase regulatory subunit 2                         | Psm2          | 19         | 4.00                 | 2.00        | 55         | 3.93                 | 1.97        |
| F7B7L8     | 26S proteasome non-ATPase regulatory subunit 3 (Fragment)              | Psm3          | 2          | 100.00               | 6.64        | 31         | 4.44                 | 2.15        |
| AOA0N4SUH4 | Pumilio homolog 3                                                      | Pum3          | 2          | 100.00               | 6.64        | 7          | 2.45                 | 1.29        |
| Q99KG3     | RNA-binding protein 10                                                 | Rbm10         | 29         | 2.77                 | 1.47        | 49         | 3.70                 | 1.89        |
| P62889     | 60S ribosomal protein L30                                              | Rpl30         | 3          | 2.85                 | 1.51        | 11         | 2.47                 | 1.30        |
| Q8CFE4     | SCY1-like protein 2                                                    | Scyl2         | 31         | 3.49                 | 1.80        | 110        | 13.50                | 3.75        |
| A2AKJ9     | Syntenin-1                                                             | Sdcbp         | 3          | 3.73                 | 1.90        | 11         | 3.66                 | 1.87        |
| P61620     | Protein transport protein Sec61 subunit alpha isoform 1                | Sec61a1       | 4          | 3.00                 | 1.59        | 13         | 2.40                 | 1.26        |
| Q31125     | Zinc transporter SLC39A7                                               | Slc39a7       | 3          | 100.00               | 6.64        | 3          | 3.33                 | 1.73        |
| E9Q1Q0     | Solute carrier family 4 (anion exchanger), member 1, adaptor protein   | Slc4a1ap      | 5          | 100.00               | 6.64        | 15         | 100.00               | 6.64        |
| Q91VJ4     | Serine/threonine-protein kinase 38                                     | Stk38         | 38         | 4.11                 | 2.04        | 77         | 5.81                 | 2.54        |
| Q7TSE6     | Serine/threonine-protein kinase 38-like                                | Stk38l        | 3          | 100.00               | 6.64        | 10         | 100.00               | 6.64        |
| Q8BI54     | SUN domain-containing protein 2                                        | Sun2          | 2          | 100.00               | 6.64        | 7          | 100.00               | 6.64        |
| Q64310     | Surfeit locus protein 4                                                | Surf4         | 2          | 4.05                 | 2.02        | 7          | 100.00               | 6.64        |
| Q8CHC4     | Synaptojanin-1                                                         | Synj1         | 2          | 2.65                 | 1.40        | 20         | 100.00               | 6.64        |
| Q8CF89     | TGF-beta-activated kinase 1 and MAP3K7-binding protein 1               | Tab1          | 28         | 2.37                 | 1.24        | 63         | 4.98                 | 2.31        |
| Q569Z6     | Thyroid hormone receptor-associated protein 3                          | Thrap3        | 73         | 3.48                 | 1.80        | 111        | 7.25                 | 2.86        |
| Q9JHU0     | Tropomodulin-3                                                         | Tmod3         | 110        | 78.00                | 6.29        | 152        | 99.03                | 6.63        |
| P17751     | Triosephosphate isomerase                                              | Tpi1          | 18         | 2.49                 | 1.31        | 34         | 2.81                 | 1.49        |
| D3Z2H9     | Tropomyosin 3, related sequence 7                                      | Tpm3-rs7      | 19         | 2.92                 | 1.55        | 92         | 3.89                 | 1.76        |
| Q6IRU2     | Tropomyosin alpha-4 chain                                              | Tpm4          | 7          | 100.00               | 6.64        | 34         | 2.75                 | 1.46        |
| Q9CQU0     | Thioredoxin domain-containing protein 12                               | Txndc12       | 2          | 100.00               | 6.64        | 11         | 100.00               | 6.64        |
| P07607     | Thymidylate synthase                                                   | Tyms          | 5          | 100.00               | 6.64        | 16         | 100.00               | 6.64        |
| Q6P5E4     | UDP-glucose:glycoprotein glucosyltransferase 1                         | Ugg1t         | 65         | 7.22                 | 2.85        | 44         | 2.78                 | 1.47        |
| Q8R5H1     | Ubiquitin carboxyl-terminal hydrolase 15                               | Usp15         | 3          | 100.00               | 6.64        | 17         | 2.63                 | 1.40        |
| E0CYH4     | WD repeat-containing protein 26 (Fragment)                             | Wdr26         | 2          | 100.00               | 6.64        | 3          | 100.00               | 6.64        |
| Q99J09     | Methylosome protein 50                                                 | Wdr77         | 9          | 4.96                 | 2.31        | 14         | 3.23                 | 1.69        |

Known ROR2-interacting proteins are highlighted in purple

Table S2

| <b>Gene name</b> | <b>Forward</b>         | <b>Reverse</b>          |
|------------------|------------------------|-------------------------|
| <i>Ccl2</i>      | GCTACAAGAGGATCACCAGCAG | GTCTGGACCCATTCTTCTTGG   |
| <i>Cd274</i>     | TGCGGACTACAAGCGAATCACG | CTCAGCTTCTGGATAACCCTCG  |
| <i>Cxcl10</i>    | ATGACGGGCCAGTGAGAATG   | TCAACACGTGGGCAGGATAG    |
| <i>Ido1</i>      | GTAGAGCGTCAAGACCTGAAAG | GATATATGCGGAGAACGTGGAA  |
| <i>lsg15</i>     | GTGCTCCAGGACGGTCTTAC   | CTCGCTGCAGTTCTGTACCA    |
| <i>Oas1</i>      | TGCATCAGGAGGTGGAGTTTG  | ATAGATTCTGGGATCAGGCTTGC |
| <i>Ror2</i>      | AATCGACACCTTGGGACAAC   | GGCCCTGAACAATGGTGATA    |
| <i>Rps16</i>     | GACGTCCCCTGGAGATGAT    | CGAATATCCACACCAGCAAA    |
