# Supplementary material
Source: Research Square preprint supplement (doi:10.21203/rs.3.rs-9532991/v1)

**Figure S1**

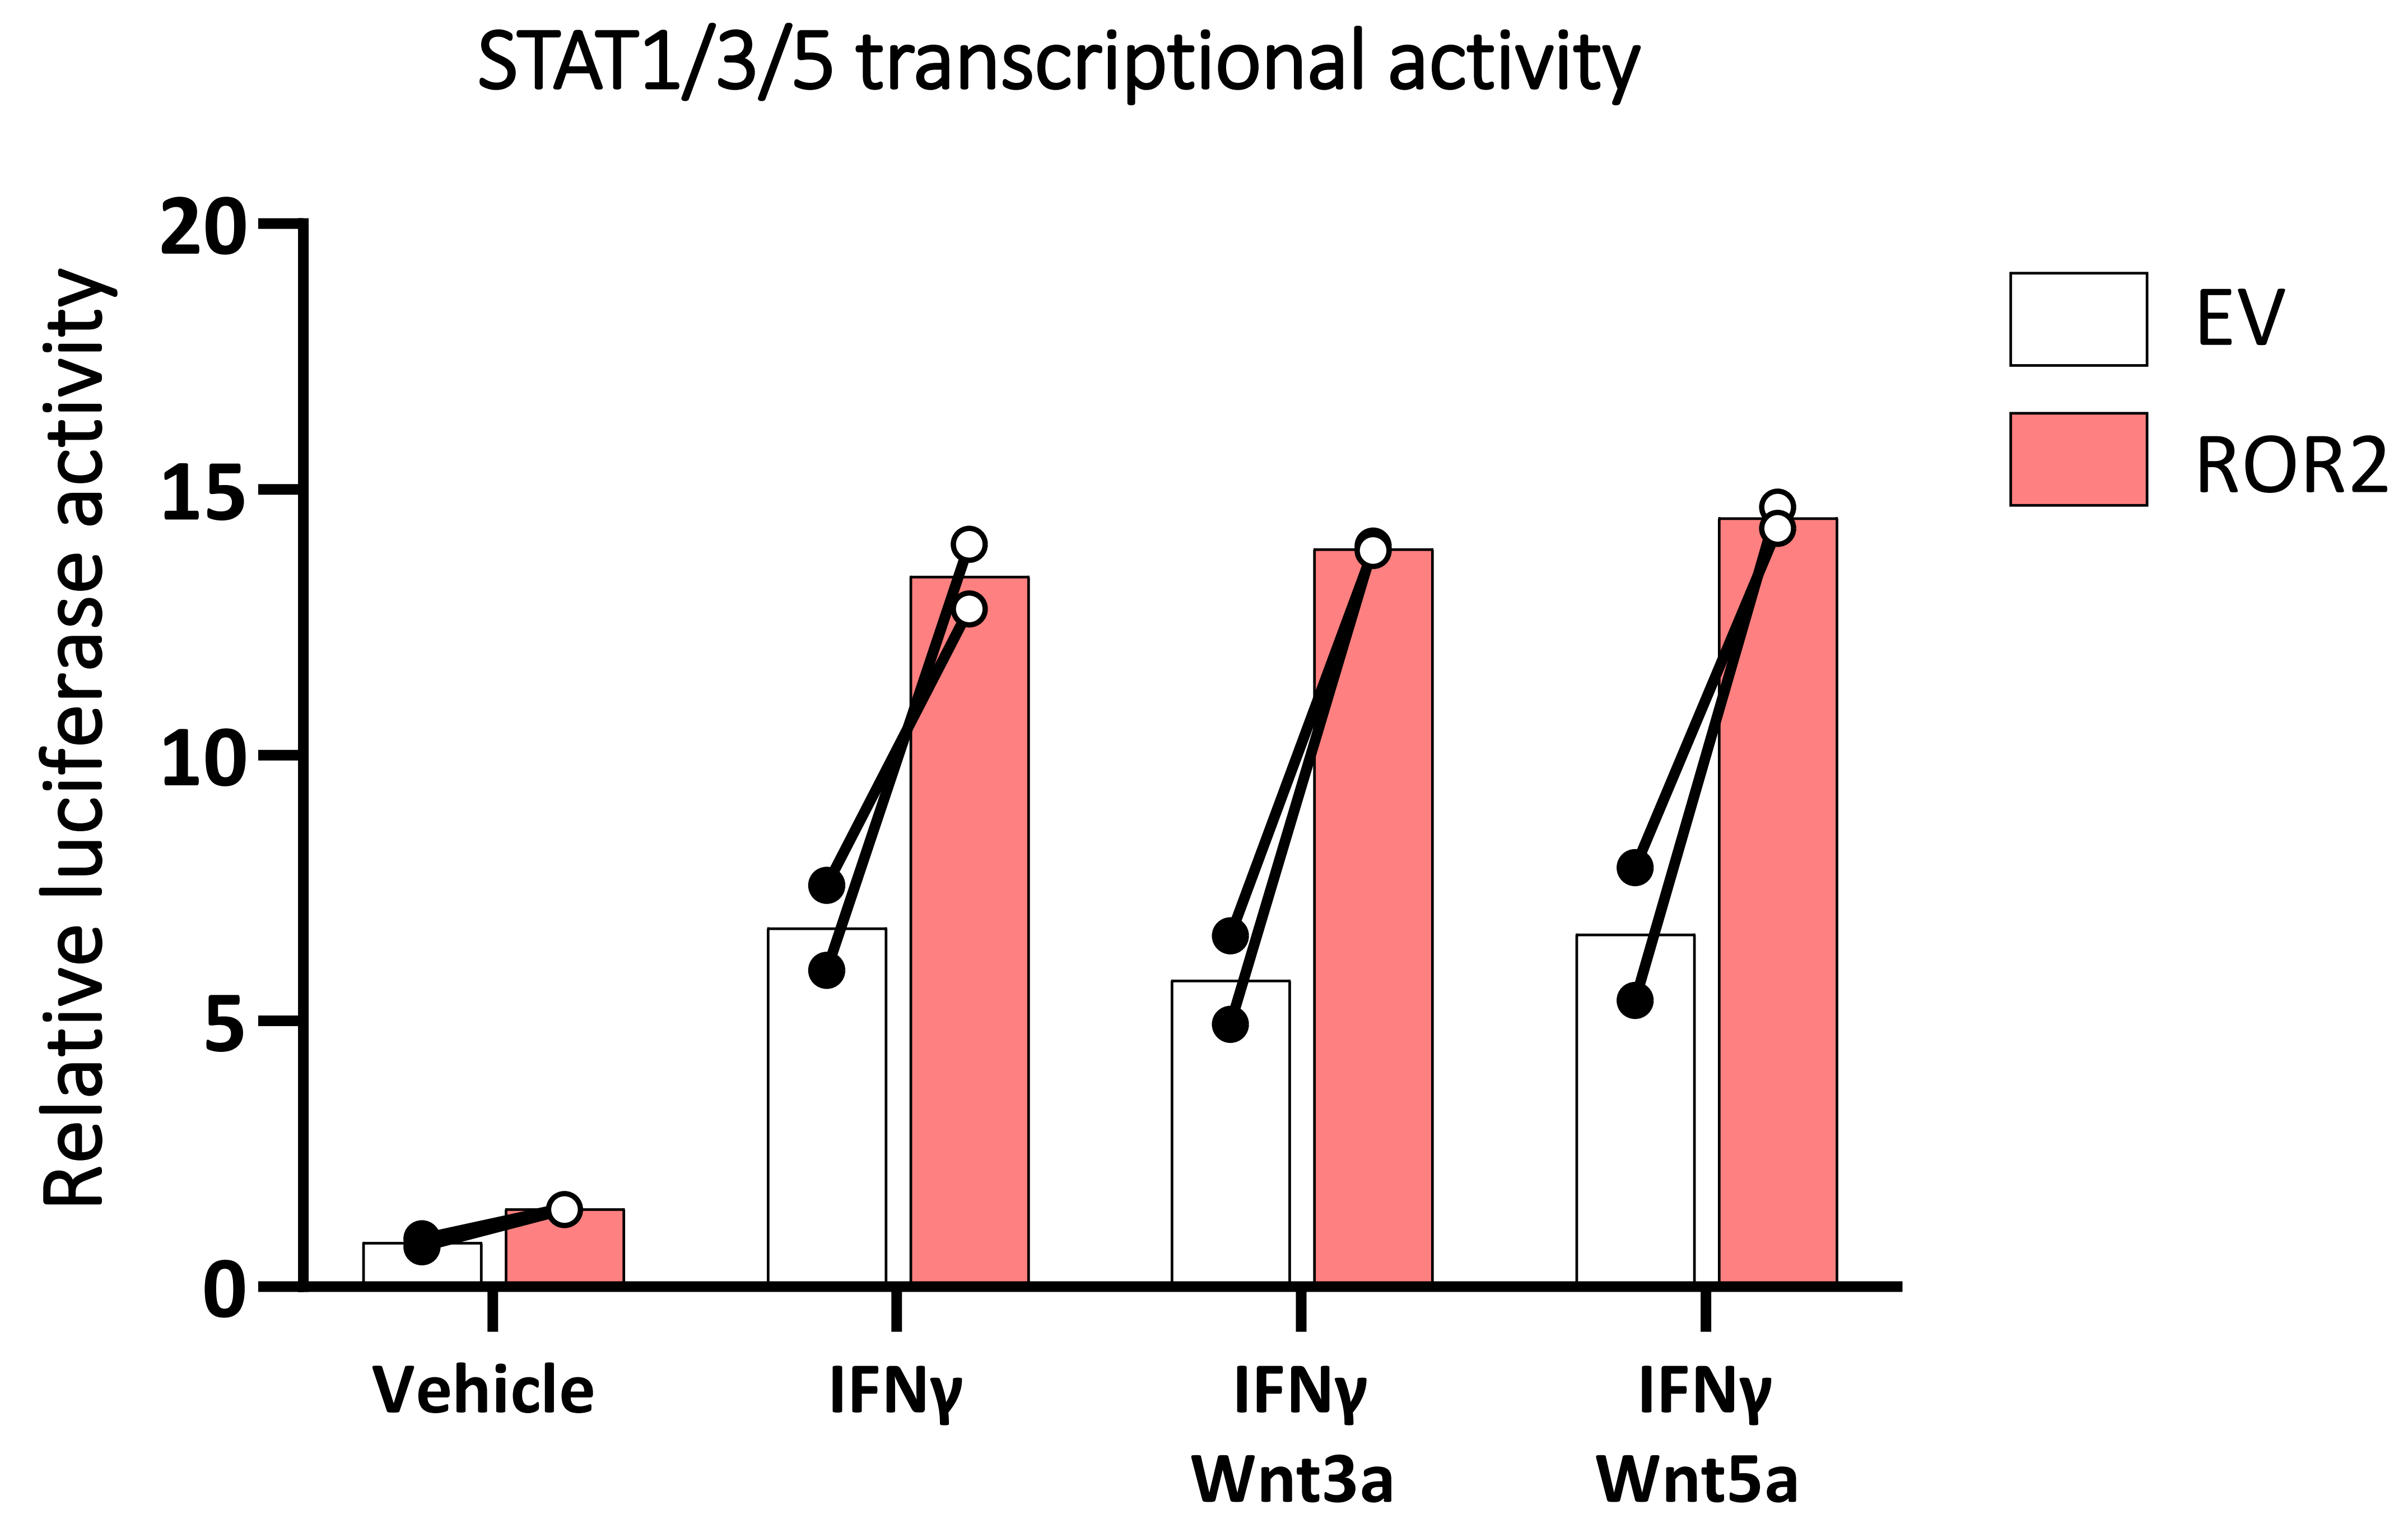

# Figure S2

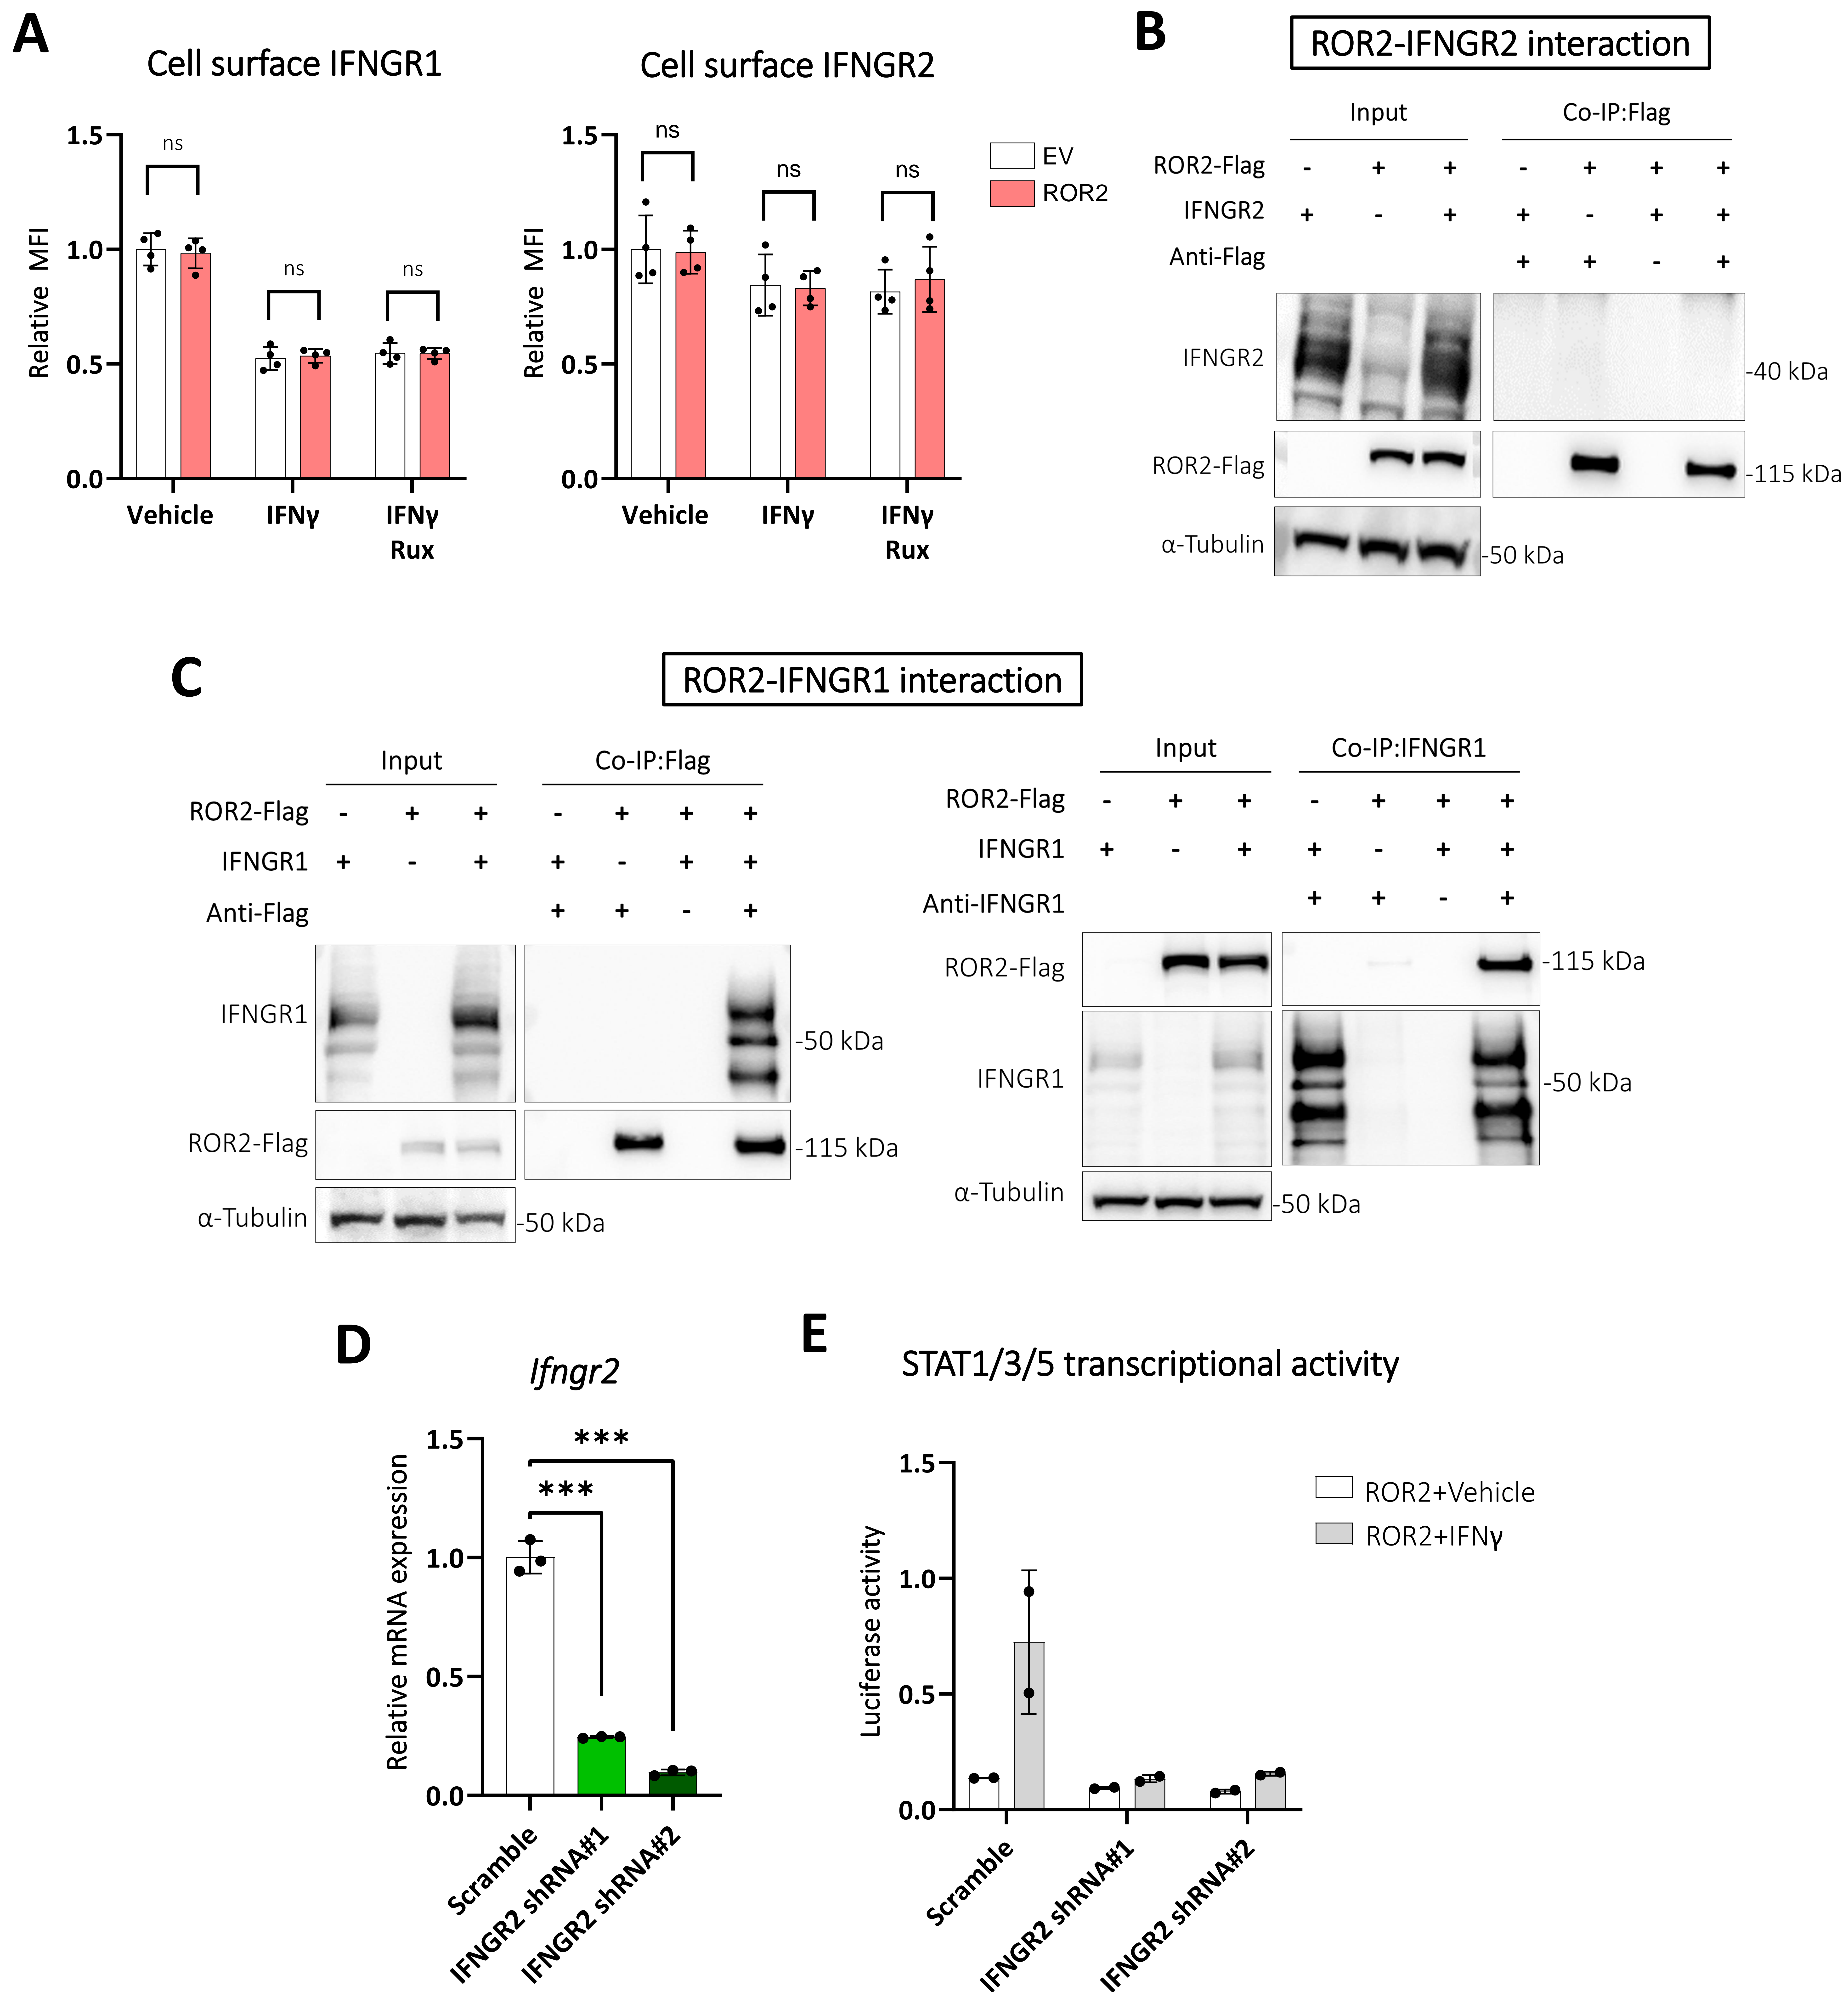

Figure S3

**A** NL-ROR2-FL & - $\Delta$ C with HT-JAK1

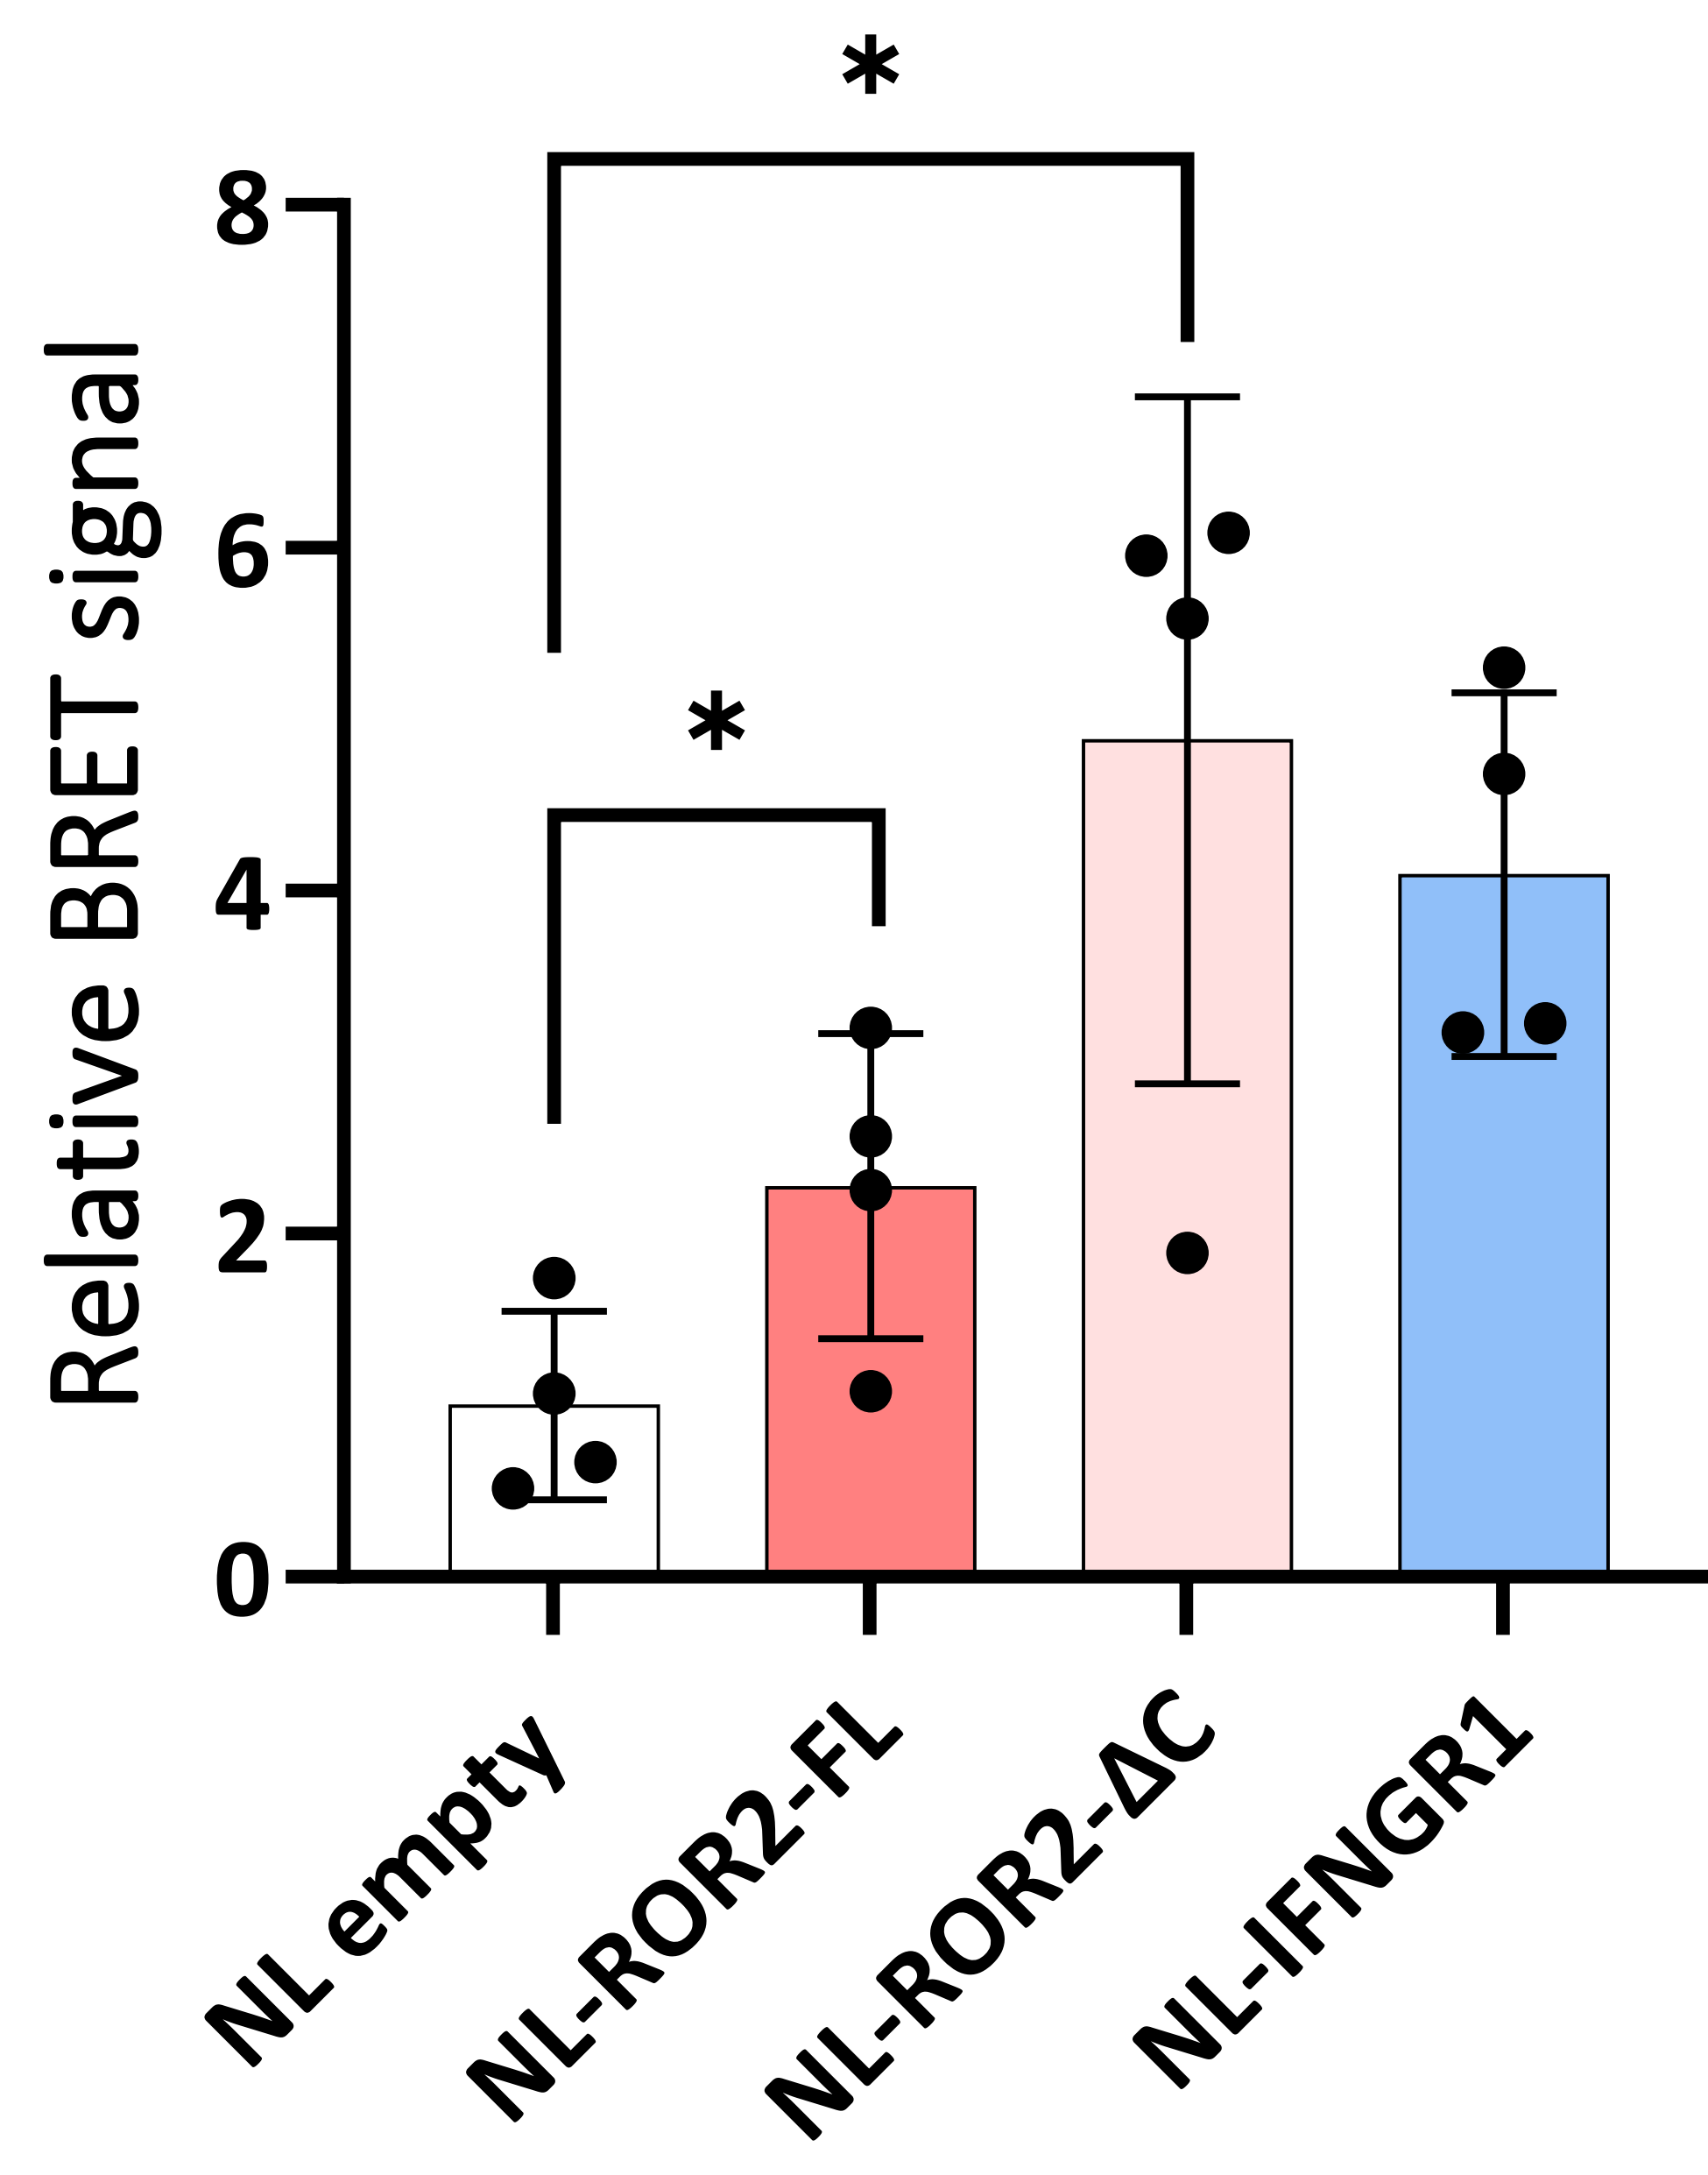

**B** NL-ROR2-FL & - $\Delta$ C with HT-JAK2

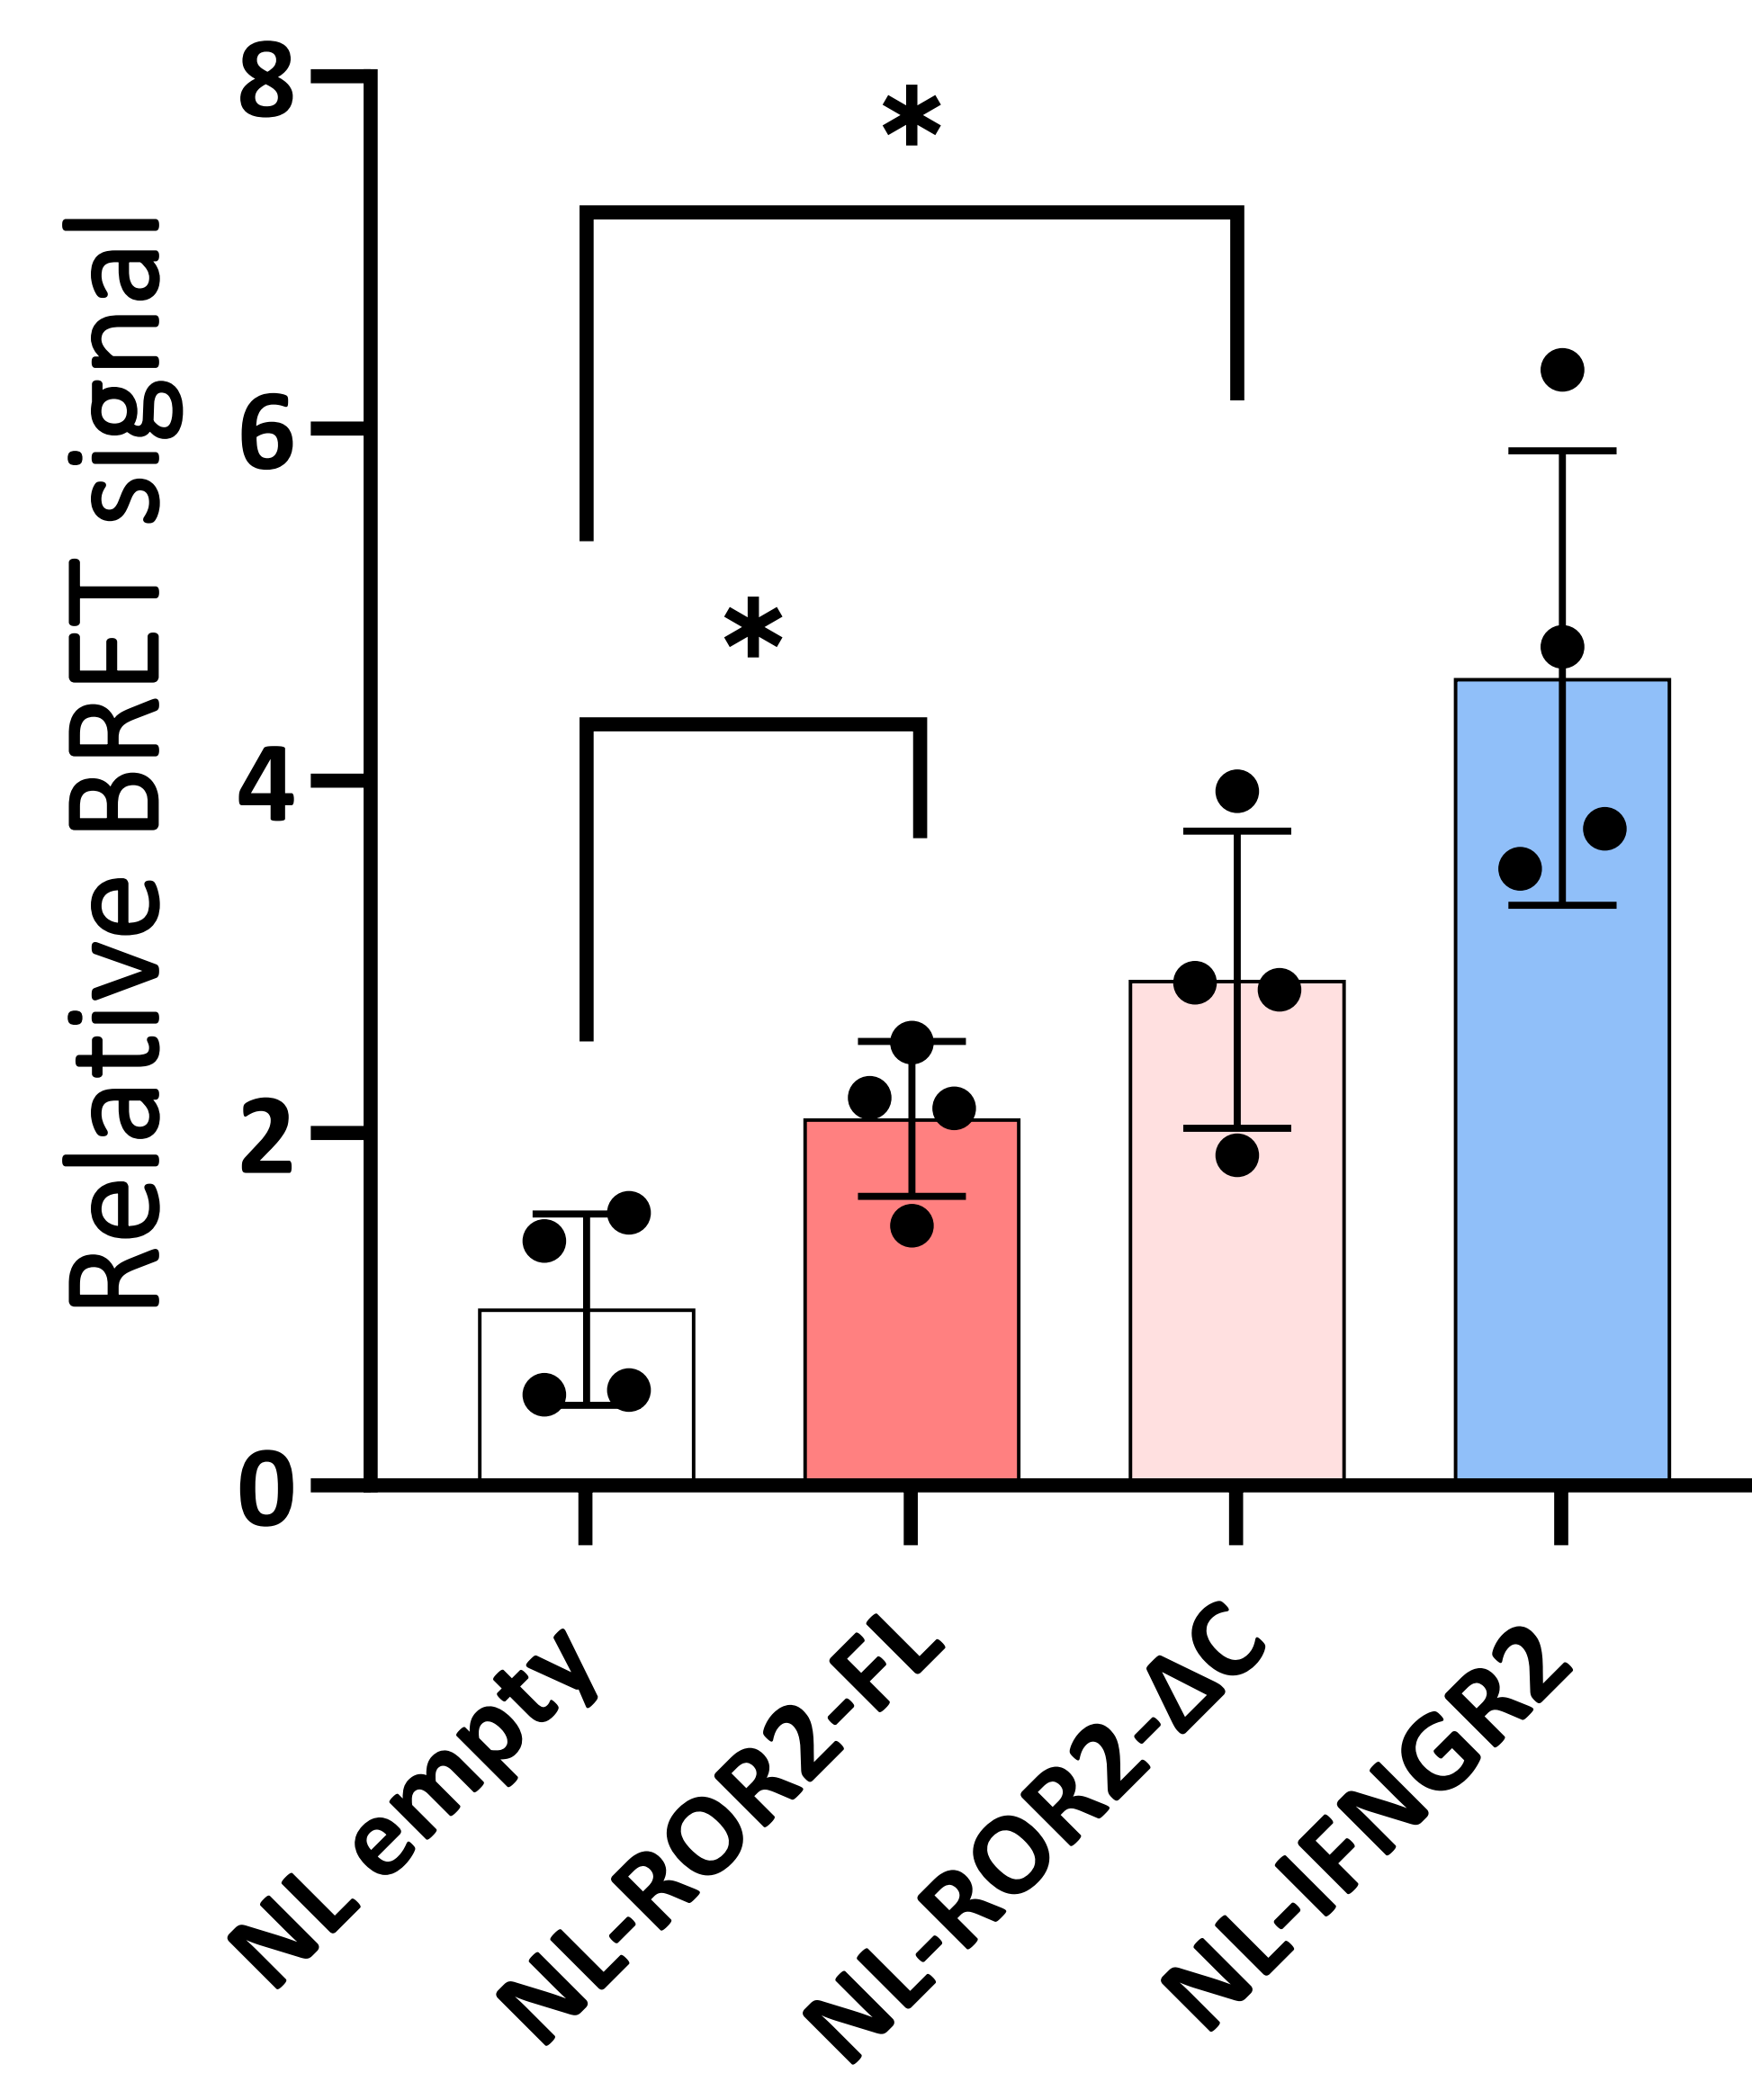

Figure S4

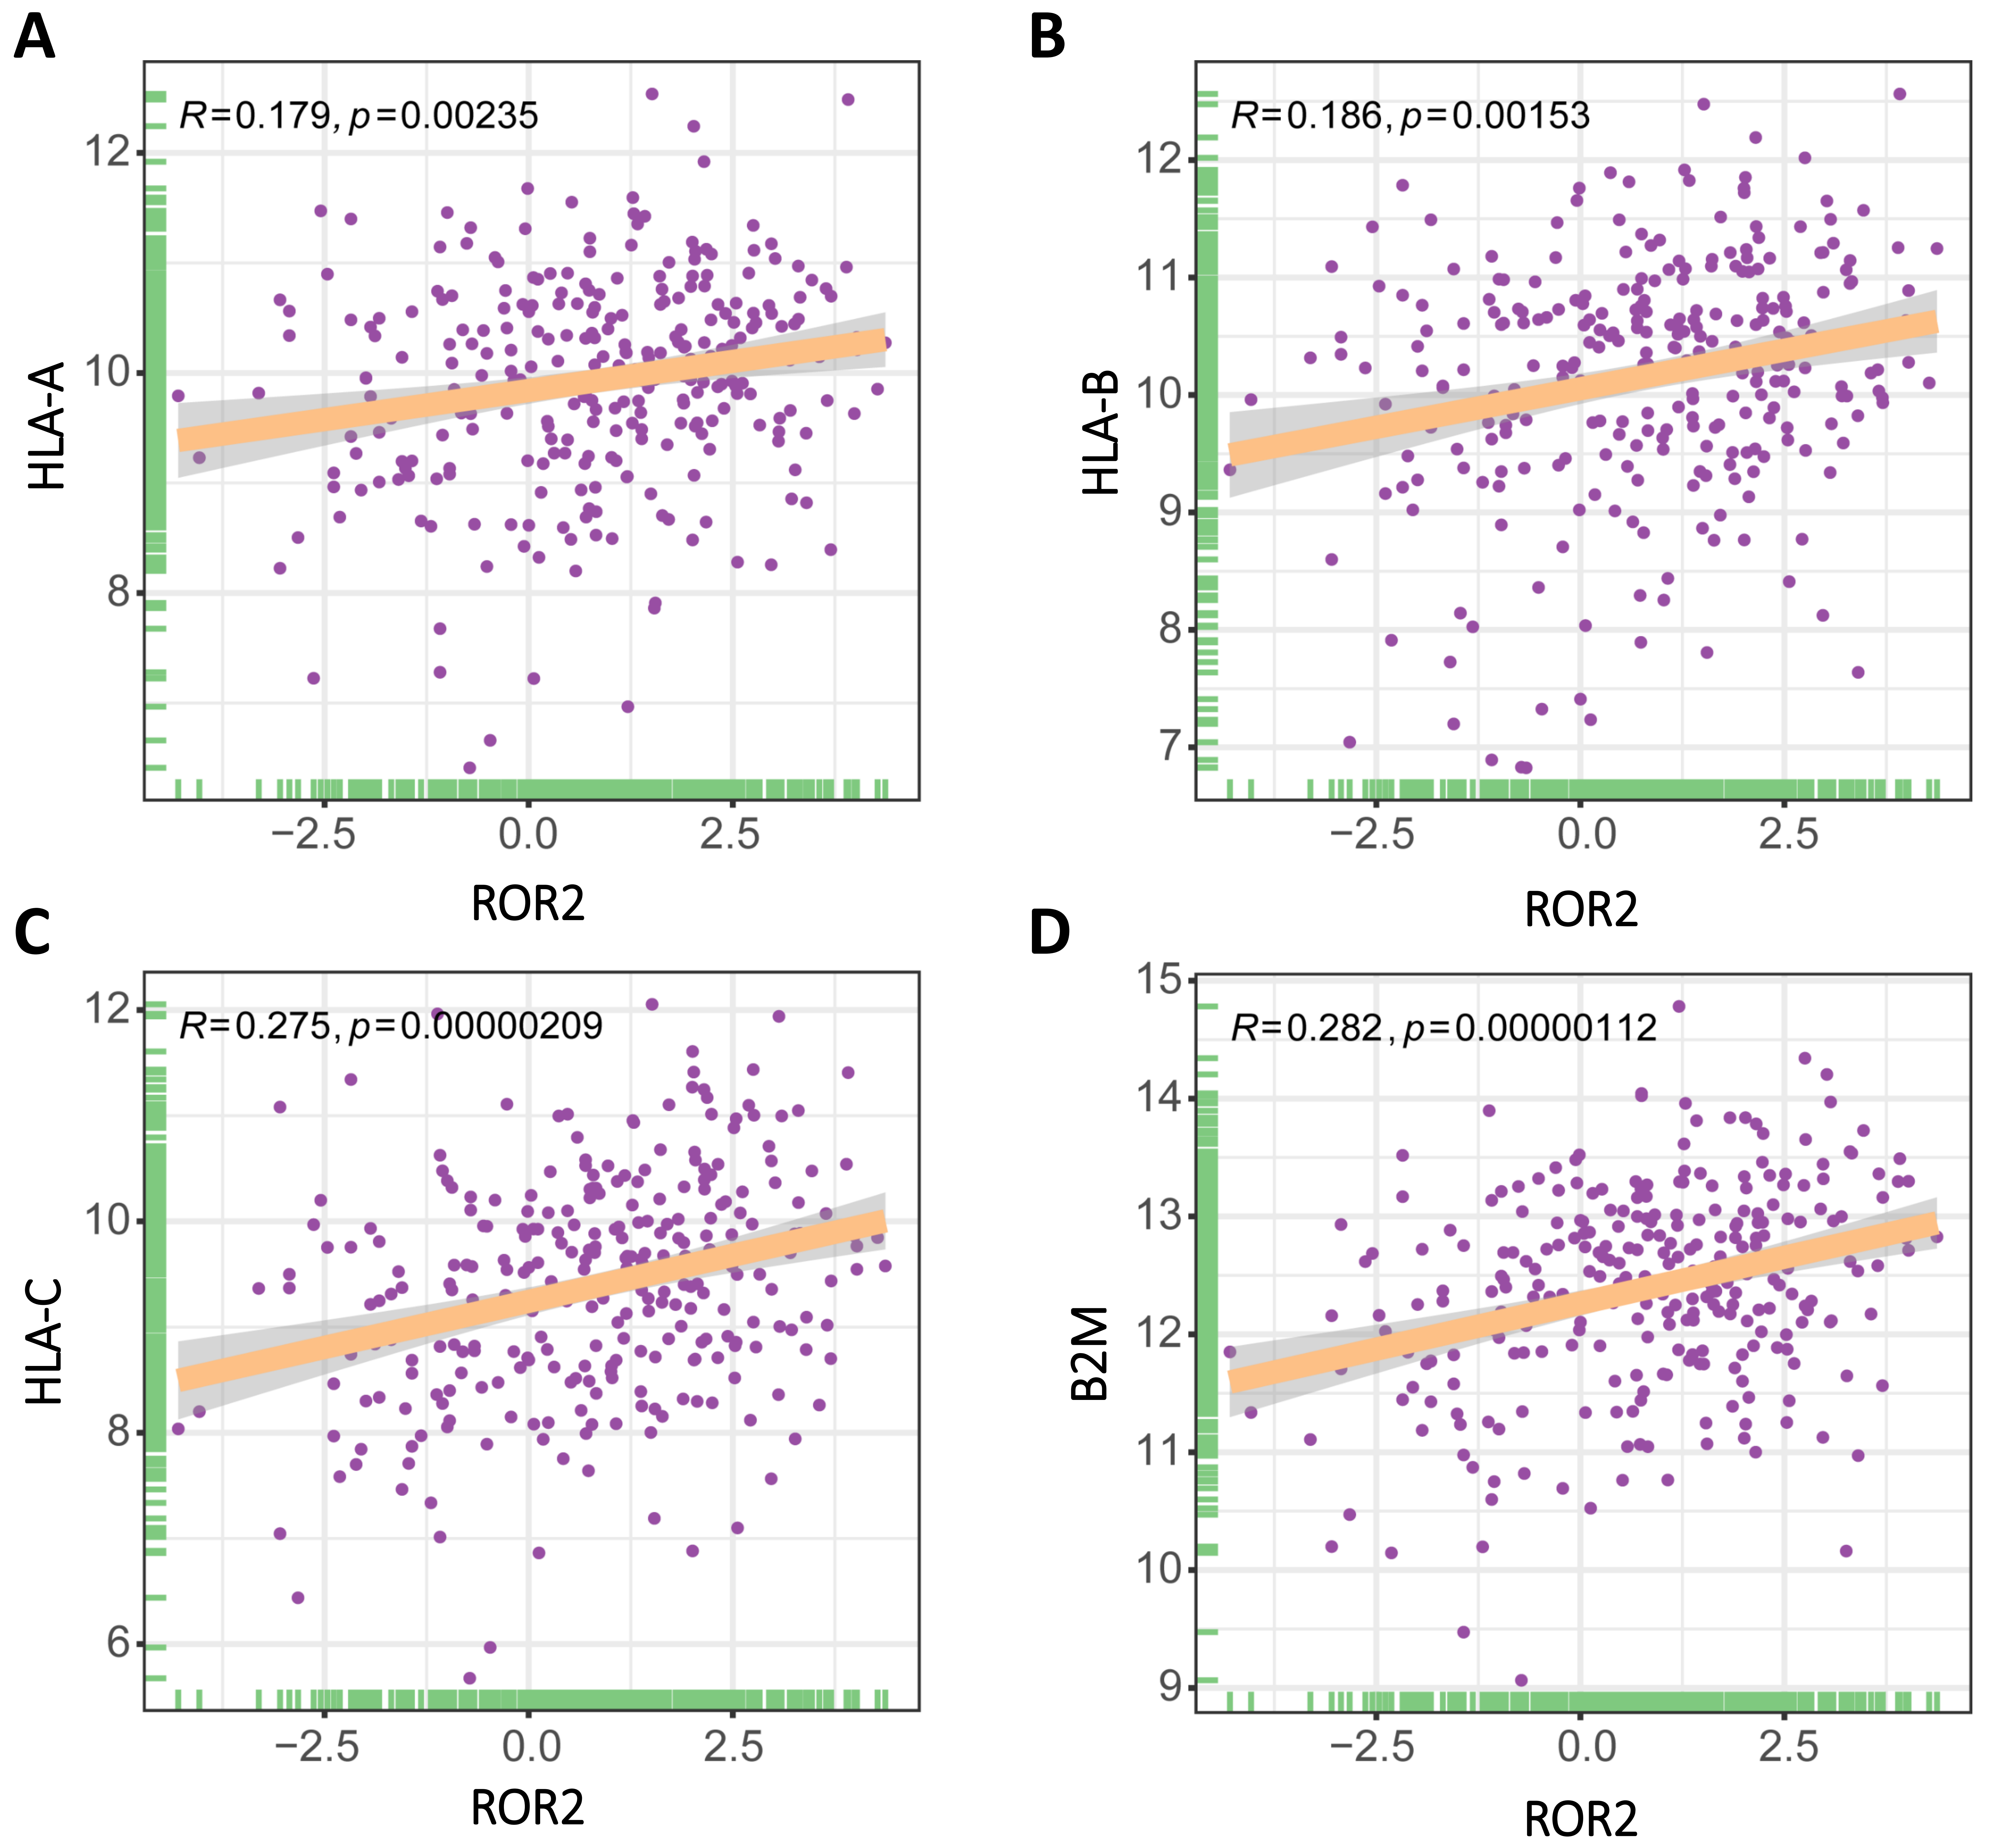

Supplement: Supplementary file 2 [file e19c751d593f8efde70a5d06.pdf]
